# Supplementary material for: Adhesive Contact of Model Randomly Rough Rubber Surfaces
Source: Springer Nature journal article supplement (doi:10.1007/s11249-019-1164-9), 2019-04-06
Supplement: 11249_2019_1164_MOESM1_ESM.pdf [file 11249_2019_1164_MOESM1_ESM.pdf]

## Supplementary Information

### Derivation and implementation of the multiasperity adhesive contact model

#### 1 Derivation of the model

We consider the indentation of a nominally flat elastic plane decorated with a distribution of spherical caps by a rigid, smooth and spherical probe. The rough surface is described by a collection of  $N$  spherical asperities having all the same radius of curvature  $R$  and prescribed positions  $(x_i, y_i, z_i)$ . Locally, the indentation of each asperity is assumed to obey JKR's theory. Elastic interactions between micro-contacts are accounted for by introducing a shift of the position of the deformable surface seen by each asperity due to the deflection caused by the neighboring ones. Accordingly, the actual indentation  $\delta_i$  of the  $i^{th}$  asperity is thus given by

$$\delta_i = \delta_i^0 + \sum_{j \neq i}^N \alpha_{ij}(\delta_j) \quad (1)$$

where  $\delta_i^0 > 0$  is the indentation depth in the absence of any elastic coupling between micro-contacts. As shown in Fig. 1,  $\delta_i^0$  is a purely geometrical term simply given by the difference between the position of the two undeformed surfaces for the prescribed indentation depth  $\Delta$ . The sum in the rhs of Eq. 1 represents the interaction term derived from JKR's theory. Instead

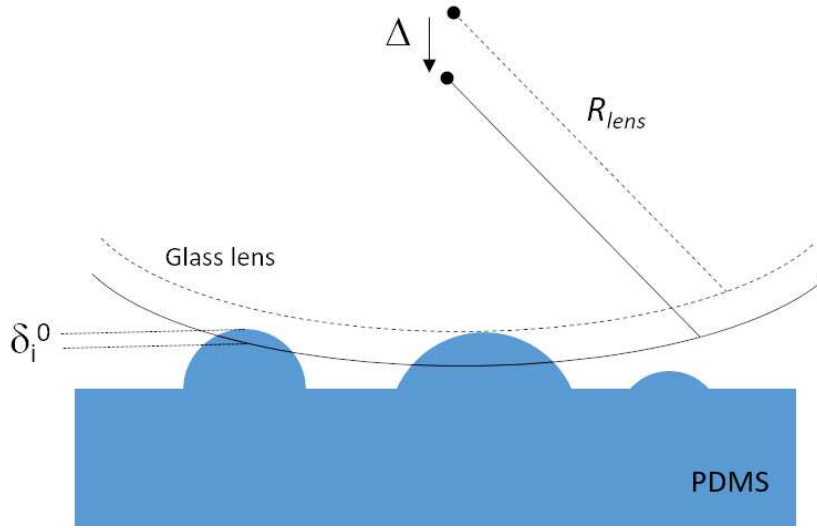

Figure 1: Sketch of the geometric configuration for the indentation of the patterned surface by a smooth rigid lens.  $\Delta$  is the prescribed indentation depth taking as a reference for the vertical position of the indenting sphere the altitude at which the smooth surface is touching the uppermost asperity.

of providing its exact expression, we derive  $\alpha_{ij}$  from an asymptotic expansion that is based on the Green's tensor [1] for a point loading on an elastic incompressible half-plane. It writes

$$(\alpha_{ij}(\delta_j)) = -\frac{3}{4\pi E} \frac{1}{r_{ij}} F(\delta_j), \quad i \neq j \quad (2)$$

where  $r_{ij}$  is the distance separating asperities  $i$  and  $j$  and where  $F(\delta_j)$  is the normal indentation load of the  $j^{\text{th}}$  asperity as obtained from JKR's theory

$$F(\delta_j) = \frac{3RK a_j(\delta_j)\delta_j - K a_j^3(\delta_j)}{2R} \quad (3)$$

where  $K = 16/9E$  is an elastic constant and  $a_j(\delta_j)$  is the contact radius of the  $j^{\text{th}}$  asperity. The latter can be determined by numerically inverting the explicit  $\delta(a)$  JKR's relationship given by

$$\delta = \frac{a^2}{R} - \sqrt{\frac{8\pi a w}{3K}} \quad (4)$$

where  $w$  is the adhesion energy. From Eq 3, the interaction term  $\alpha_{ij}(\delta_j)$  can be rewritten as

$$(\alpha_{ij}(\delta_j)) = -\frac{4}{3\pi} \frac{1}{r_{ij}} f(\delta_j), \quad i \neq j \quad (5)$$

with

$$f(\delta_j) = \frac{3R a_j(\delta_j)\delta_j - a_j^3(\delta_j)}{2R} \quad (6)$$

This asymptotic expression of the interaction term is expected to be valid as long as the distance  $r_{ij}$  between two neighboring microcontacts is large with respect to their respective contact radii. From a comparison with the exact JKR expression [2] for vertical displacement of the free surface (Fig. 2), we found that the asymptotic expression provides a very accurate value of the surface displacement since  $r_{ij} > 3a_{i,j}$ , which is always verified experimentally.

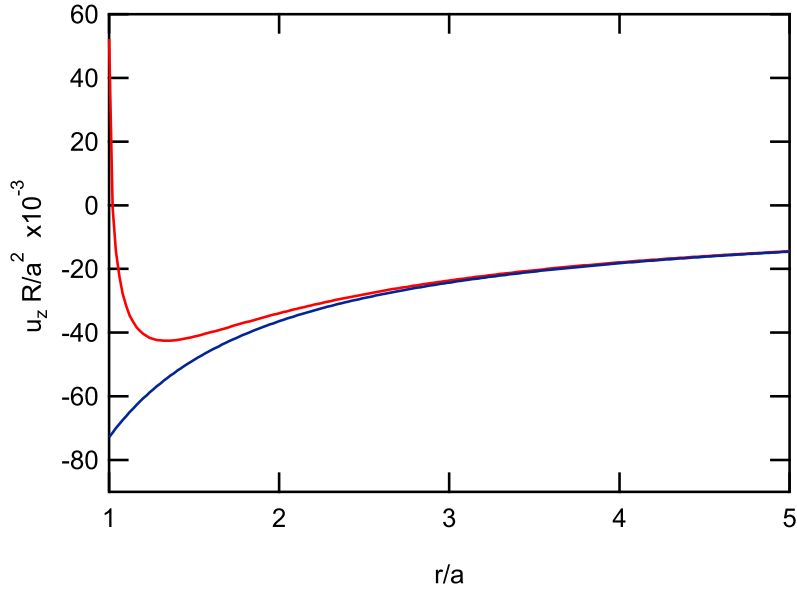

Figure 2: Normalized vertical displacement of the surface  $u_z R/a^2$  calculated using the exact JKR relationship (red curve) and the asymptotic expression given in Eq. 1 (blue curve) for  $P/(3\pi w R) = 0.5$  ( $R$  is the radius of the sphere,  $r$  is the radial coordinate and  $a$  is the contact radius).

## 2 Numerical implementation

Writing  $V_i = z_i - d$ , with  $d$  being the approach distance of the two surfaces at the location of the  $i^{th}$  asperity, the contact problem is the solution of the following set of non-linear equations

$$\mathbf{F}(\delta) = \delta - V - \mathbf{A} \cdot \varphi(\delta) = 0 \quad (7)$$

with  $\mathbf{A} = (\alpha_{ij}(\delta_j))$  and

$$\varphi(u) = f(u) \quad u \geq 0 ; \quad \varphi(u) = 0 \quad u < 0 \quad (8)$$

This set of equations is solved using a Newton-Raphson algorithm as follows

$$\delta_{n+1} = \delta_n - \mathbf{J}_F^{-1}(\delta_n) \cdot \mathbf{F}(\delta_n) \quad (9)$$

where  $\mathbf{J}_F$  is the Jacobian defined by

$$\mathbf{J}_F = \left( \frac{\partial F_i}{\partial \delta_k} \right) = \delta_{ik} - \mathbf{A} \cdot \varphi'(\delta_k) \quad (10)$$

According to Eq. (10)

$$\mathbf{J}_F(\delta) = \mathbf{I} - \mathbf{Q} \quad (11)$$

with

$$\mathbf{Q} = \alpha_{ij} \cdot \varphi'(\delta_k) \quad (12)$$

At each computation step,  $\mathbf{J}_F^{-1}$  is calculated and numerically inverted in order to compute  $\delta_{n+1}$  from  $\delta_n$ . The calculation is repeated until  $\sum |\delta_{n+1} - \delta_n|$  is lower than a prescribed convergency criterion.

## References

- [1] Landau, L.D. and Lifshitz, E.M., *Theory of elasticity* (Pergamon, 1986)
- [2] Maugis, D., *Contact, adhesion and rupture of elastic solids* (Springer, Berlin, 1999)
